# Supplementary material for: Modifications of the urinary metabolome in young women after cranberry juice consumption were revealed using the UHPLC-Q-orbitrap-HRMS-based metabolomics approach
Source: Royal Society of Chemistry journal article supplement (doi:10.1039/c9fo02266j), 2020-01-01
Supplement: c9fo02266j1.pdf [file c9fo02266j1.pdf]

### Supplemental Data

Table S1. Unidentified discriminant metabolic features in human urine after cranberry juice or apple juice by negative ionization

| Retention Tim (min) | Detected Mass [M-H] <sup>-</sup> | p[1] (contribution) <sup>a</sup> | p(corr)[1] (confidence) <sup>b</sup> | Cranberry juice vs. Apple juice <sup>c</sup> | Cranberry juice vs. baseline <sup>d</sup> |
|---------------------|----------------------------------|----------------------------------|--------------------------------------|----------------------------------------------|-------------------------------------------|
| 0.91                | 192.0586                         | 0.070                            | 0.732                                | ----                                         | ↑                                         |
| 1.00                | 179.9963                         | 0.183 (0.174)                    | 0.931 (0.953)                        | ↑                                            | ↑                                         |
| 2.13                | 205.0711                         | 0.076(0.078)                     | 0.665 (0.721)                        | ↑                                            | ↑                                         |
| 2.97                | 190.9646                         | 0.064 (0.068)                    | 0.610 (0.722)                        | ↑                                            | ↑                                         |
| 3.73                | 200.0921                         | 0.080                            | 0.691                                | ↑                                            | ----                                      |
| 4.17                | 141.0545                         | 0.073                            | 0.677                                | ↑                                            | ----                                      |
| 5.49                | 162.9879                         | 0.156 (0.160)                    | 0.835 (0.905)                        | ↑                                            | ↑                                         |
| 5.59                | 163.9890                         | 0.163 (0.156)                    | 0.936 (0.973)                        | ↑                                            | ↑                                         |
| 5.62                | 82.0283                          | 0.171 (0.164)                    | 0.924 (0.965)                        | ↑                                            | ↑                                         |
| 5.62                | 291.9446                         | 0.177 (0.176)                    | 0.909 (0.956)                        | ↑                                            | ↑                                         |
| 5.66                | 346.9621                         | 0.199 (0.185)                    | 0.926 (0.953)                        | ↑                                            | ↑                                         |
| 5.67                | 163.9816                         | 0.189 (0.191)                    | 0.908 (0.960)                        | ↑                                            | ↑                                         |
| 5.69                | 273.9641                         | 0.160 (0.156)                    | 0.935(0.973)                         | ↑                                            | ↑                                         |
| 5.74                | 177.9806                         | 0.181 (0.185)                    | 0.891 (0.958)                        | ↑                                            | ↑                                         |
| 5.74                | 161.9856                         | 0.188 (0.207)                    | 0.842 (0.941)                        | ↑                                            | ↑                                         |
| 5.75                | 162.9882                         | 0.163 (0.169)                    | 0.905 (0.958)                        | ↑                                            | ↑                                         |
| 5.86                | 77.9635                          | 0.155 (0.162)                    | 0.922(0.952)                         | ↑                                            | ↑                                         |
| 5.90                | 346.9621                         | 0.212 (0.200)                    | 0.947 (0.970)                        | ↑                                            | ↑                                         |
| 5.91                | 163.9889                         | 0.162 (0.159)                    | 0.930 (0.967)                        | ↑                                            | ↑                                         |
| 5.91                | 163.9815                         | 0.175 (0.190)                    | 0.899 (0.965)                        | ↑                                            | ↑                                         |
| 5.93                | 161.9856                         | 0.176 (0.190)                    | 0.833 (0.931)                        | ↑                                            | ↑                                         |

Table S1. Continued.

| Retention<br>Tim (min) | Detected<br>Mass [M-H] <sup>-</sup> | p[1]<br>(contribution) <sup>a</sup> | p(corr)[1]<br>(confidence) <sup>b</sup> | Cranberry<br>juice vs.<br>Apple juice <sup>c</sup> | Cranberry<br>juice vs.<br>Baseline <sup>d</sup> |
|------------------------|-------------------------------------|-------------------------------------|-----------------------------------------|----------------------------------------------------|-------------------------------------------------|
| 5.95                   | 77.9635                             | 0.156(0.157)                        | 0.917(0.946)                            | ↑                                                  | ↑                                               |
| 6.00                   | 177.9808                            | 0.161(0.147)                        | 0.902(0.892)                            | ↑                                                  | ↑                                               |
| 6.01                   | 291.9443                            | 0.154 (0.148)                       | 0.915 (0.919)                           | ↑                                                  | ↑                                               |
| 6.05                   | 82.0283                             | 0.145 (0.140)                       | 0.926 (0.953)                           | ↑                                                  | ↑                                               |
| 6.47                   | 344.0305                            | 0.084 (0.075)                       | 0.813 (0.862)                           | ↑                                                  | ↑                                               |
| 6.56                   | 432.0720                            | 0.106 (0.108)                       | 0.874 (0.928)                           | ↑                                                  | ↑                                               |
| 6.63                   | 360.0609                            | 0.088 (0.087)                       | 0.699 (0.726)                           | ↑                                                  | ↑                                               |
| 7.11                   | 229.9741                            | 0.099 (0.074)                       | 0.700 (0.688)                           | ↑                                                  | ↑                                               |
| 7.27                   | 220.0535                            | 0.089                               | 0.649                                   | ↑                                                  | ---                                             |
| 7.45                   | 185.0811                            | 0.082 (0.057)                       | 0.826 (0.829)                           | ↑                                                  | ↑                                               |
| 7.57                   | 199.0605                            | 0.076 (0.066)                       | 0.908 (0.886)                           | ↑                                                  | ↑                                               |
| 7.63                   | 229.1076                            | 0.082 (0.071)                       | 0.826(0.783)                            | ↑                                                  | ↑                                               |
| 8.03                   | 204.9968                            | 0.062                               | 0.628                                   | ↑                                                  | ---                                             |
| 8.04                   | 204.0045                            | 0.056 (0.053)                       | 0.769 (0.821)                           | ↑                                                  | ↑                                               |
| 8.10                   | 181.0698                            | 0.064                               | 0.738                                   | ---                                                | ↑                                               |
| 8.12                   | 274.0755                            | 0.066 (0.059)                       | 0.797 (0.847)                           | ↑                                                  | ↑                                               |
| 8.23                   | 443.0101                            | 0.109 (0.126)                       | 0.799 (0.909)                           | ↑                                                  | ↑                                               |
| 8.24                   | 430.9833                            | 0.099 (0.126)                       | 0.781 (0.884)                           | ↑                                                  | ↑                                               |
| 8.26                   | 432.9802                            | 0.101 (0.132)                       | 0.750 (0.891)                           | ↑                                                  | ↑                                               |
| 8.27                   | 441.0156                            | 0.111 (0.117)                       | 0.833 (0.914)                           | ↑                                                  | ↑                                               |
| 8.29                   | 434.9778                            | 0.155 (0.135)                       | 0.796 (0.912)                           | ↑                                                  | ↑                                               |

<sup>a</sup> The p[1] values of OPLS-DA model comparing cranberry juice with baseline are in inside the parentheses.

<sup>b</sup> The p (corr) [1] values of OPLS-DA model comparing cranberry juice with baseline are in inside the parentheses.

<sup>c</sup> Arrows indicated an increase or decrease of metabolite level in human urine after drinking cranberry juice versus apple juice.

<sup>d</sup> Arrows indicated an increase or decrease of metabolite level in human urine after drinking cranberry juice versus baseline.

Table S2. Unidentified discriminant metabolic features in human urine after cranberry juice or apple juice by positive ionization

| Retention Tim (min) | Detected Mass [M+H] <sup>+</sup> | p[1] (contribution) <sup>a</sup> | p(corr)[1] (confidence) <sup>b</sup> | Cranberry juice vs. Apple juice <sup>c</sup> | Cranberry juice vs. Baseline <sup>d</sup> |
|---------------------|----------------------------------|----------------------------------|--------------------------------------|----------------------------------------------|-------------------------------------------|
| 0.870               | 197.10                           | -0.071                           | -0.738                               | ↓                                            | ----                                      |
| 1.087               | 179.09                           | -0.093                           | -0.761                               | ↓                                            | ----                                      |
| 1.970               | 196.03                           | 0.067 (0.072)                    | 0.736 (0.816)                        | ↑                                            | ↑                                         |
| 2.039               | 143.07                           | 0.057 (0.063)                    | 0.744 (0.763)                        | ↑                                            | ↑                                         |
| 2.157               | 264.09                           | 0.086 (0.080)                    | 0.763 (0.750)                        | ↑                                            | ↑                                         |
| 2.920               | 125.06                           | 0.055                            | 0.826                                | ----                                         | ↑                                         |
| 3.143               | 129.54                           | 0.073 (0.061)                    | 0.744 (0.645)                        | ↑                                            | ↑                                         |
| 3.412               | 120.53                           | 0.105 (0.108)                    | 0.845 (0.836)                        | ↑                                            | ↑                                         |
| 3.426               | 143.07                           | 0.064 (0.077)                    | 0.816 (0.801)                        | ↑                                            | ↑                                         |
| 3.528               | 202.11                           | 0.061                            | 0.690                                | ↑                                            | ----                                      |
| 4.009               | 129.54                           | 0.074 (0.069)                    | 0.800 (0.812)                        | ↑                                            | ↑                                         |
| 4.119               | 285.08                           | 0.103 (0.103)                    | 0.714 (0.632)                        | ↑                                            | ↑                                         |
| 4.152               | 127.08                           | 0.059 (0.051)                    | 0.692 (0.602)                        | ↑                                            | ↑                                         |
| 5.264               | 149.01                           | 0.131 (0.133)                    | 0.897 (0.927)                        | ↑                                            | ↑                                         |
| 5.367               | 237.97                           | 0.197 (0.201)                    | 0.922 (0.943)                        | ↑                                            | ----                                      |
| 5.418               | 255.98                           | 0.182 (0.188)                    | 0.925 (0.944)                        | ↑                                            | ↑                                         |
| 5.466               | 253.94                           | 0.158 (0.159)                    | 0.929 (0.923)                        | ↑                                            | ↑                                         |
| 5.466               | 265.96                           | 0.167 (0.181)                    | 0.909 (0.937)                        | ↑                                            | ↑                                         |
| 5.487               | 276.96                           | 0.175 (0.172)                    | 0.935 (0.926)                        | ↑                                            | ↑                                         |
| 5.689               | 140.00                           | 0.167 (0.176)                    | 0.917 (0.930)                        | ↑                                            | ↑                                         |
| 5.723               | 151.51                           | 0.202 (0.213)                    | 0.900 (0.914)                        | ↑                                            | ↑                                         |
| 5.736               | 260.99                           | 0.161 (0.161)                    | 0.905 (0.922)                        | ↑                                            | ↑                                         |

Table S2. Continued.

| Retention<br>Tim (min) | Detected<br>Mass [M+H] <sup>+</sup> | p[1]<br>(contribution)<br><sup>a</sup> | p(corr)[1]<br>(confidence) <sup>b</sup> | Cranberry juice<br>vs. Apple Juice <sup>c</sup> | Cranberry<br>juice vs.<br>Baseline <sup>d</sup> |
|------------------------|-------------------------------------|----------------------------------------|-----------------------------------------|-------------------------------------------------|-------------------------------------------------|
| 5.86                   | 130.9966                            | 0.121 (0.120)                          | 0.926 (0.921)                           | ↑                                               | ↑                                               |
| 5.88                   | 142.5044                            | 0.132 (0.146)                          | 0.910 (0.924)                           | ↑                                               | ↑                                               |
| 5.90                   | 229.0314                            | 0.105 (0.103)                          | 0.933 (0.954)                           | ↑                                               | ↑                                               |
| 5.95                   | 152.5208                            | 0.111 (0.109)                          | 0.917 (0.920)                           | ↑                                               | ↑                                               |
| 6.03                   | 207.0620                            | 0.124 (0.112)                          | 0.904 (0.950)                           | ↑                                               | ↑                                               |
| 6.08                   | 141.5363                            | 0.116 (0.109)                          | 0.921 (0.945)                           | ↑                                               | ↑                                               |
| 6.22                   | 164.0288                            | 0.089 (0.089)                          | 0.902 (0.942)                           | ↑                                               | ↑                                               |
| 6.57                   | 116.5105                            | 0.071 (0.091)                          | 0.522 (0.581)                           | ↑                                               | ↑                                               |
| 6.75                   | 247.0131                            | 0.072 (0.080)                          | 0.618 (0.653)                           | ↑                                               | ↑                                               |
| 6.90                   | 133.5387                            | 0.121 (0.114)                          | 0.942 (0.952)                           | ↑                                               | ↑                                               |
| 6.91                   | 201.0752                            | 0.051                                  | 0.838                                   | ↑                                               | ----                                            |
| 7.04                   | 311.0009                            | 0.076 (0.058)                          | 0.722 (0.598)                           | ↑                                               | ↑                                               |
| 7.07                   | 288.1806                            | 0.062                                  | 0.675                                   | ↑                                               | ----                                            |
| 7.14                   | 149.5338                            | 0.055                                  | 0.826                                   | ↑                                               | ----                                            |
| 7.25                   | 129.0184                            | 0.065                                  | 0.716                                   | ↑                                               | ----                                            |
| 7.26                   | 155.5507                            | 0.051                                  | 0.740                                   | ----                                            | ↑                                               |
| 7.30                   | 159.5291                            | 0.070                                  | 0.741                                   | ↑                                               | ----                                            |
| 7.32                   | 243.0476                            | 0.092 (0.067)                          | 0.728 (0.601)                           | ↑                                               | ↑                                               |
| 7.35                   | 187.0966                            | 0.058                                  | 0.832                                   | ↑                                               | ----                                            |
| 7.36                   | 150.5233                            | 0.060                                  | 0.698                                   | ↑                                               | ----                                            |
| 7.41                   | 143.5701                            | 0.063                                  | 0.605                                   | ↑                                               | ----                                            |
| 7.46                   | 142.5424                            | 0.064 (0.053)                          | 0.861 (0.806)                           | ↑                                               | ↑                                               |
| 7.68                   | 213.1122                            | 0.062                                  | 0.792                                   | ↑                                               | ----                                            |
| 7.72                   | 204.0420                            | 0.059                                  | 0.756                                   | ↑                                               | ----                                            |

Table S2. Continued.

| Retention<br>Tim (min) | Detected<br>Mass [M+H] <sup>+</sup> | p[1]<br>(contribution)<br><sup>a</sup> | p(corr)[1]<br>(confidence) <sup>b</sup> | Cranberry juice<br>vs. Apple juice <sup>c</sup> | Cranberry<br>juice vs.<br>Baseline <sup>d</sup> |
|------------------------|-------------------------------------|----------------------------------------|-----------------------------------------|-------------------------------------------------|-------------------------------------------------|
| 7.78                   | 183.5290                            | 0.074 (0.070)                          | 0.767 (0.798)                           | ↑                                               | ↑                                               |
| 7.89                   | 203.544                             | 0.068 (0.073)                          | 0.788 (0.824)                           | ↑                                               | ↑                                               |
| 8.03                   | 404.5529                            | 0.066 (0.077)                          | 0.755 (0.831)                           | ↑                                               | ↑                                               |
| 8.03                   | 591.0945                            | 0.071 (0.068)                          | 0.689 (0.790)                           | ↑                                               | ↑                                               |
| 8.04                   | 576.1292                            | 0.056 (0.069)                          | 0.690 (0.797)                           | ↑                                               | ↑                                               |
| 8.04                   | 413.0433                            | 0.063 (0.057)                          | 0.672 (0.776)                           | ↑                                               | ↑                                               |
| 8.04                   | 421.0505                            | 0.051                                  | 0.636                                   | ----                                            | ↑                                               |
| 8.04                   | 180.0144                            | 0.050 (0.060)                          | 0.663 (0.796)                           | ↑                                               | ↑                                               |
| 8.05                   | 415.0440                            | 0.071                                  | 0.782                                   | ----                                            | ↑                                               |
| 8.05                   | 181.2448                            | 0.056 (0.060)                          | 0.584 (0.583)                           | ↑                                               | ↑                                               |
| 8.05                   | 178.8979                            | 0.065 (0.057)                          | 0.561 (0.559)                           | ↑                                               | ↑                                               |
| 8.06                   | 204.1052                            | 0.084 (0.108)                          | 0.748 (0.810)                           | ↑                                               | ↑                                               |
| 8.06                   | 236.1807                            | -0.059                                 | -0.545                                  | ↓                                               | ----                                            |
| 8.08                   | 243.5619                            | -0.062                                 | -0.699                                  | ↓                                               | ----                                            |
| 8.09                   | 364.0349                            | -0.075                                 | -0.762                                  | ↓                                               | ----                                            |
| 8.09                   | 181.5549                            | -0.050                                 | -0.755                                  | ↓                                               | ----                                            |
| 8.10                   | 172.5497                            | -0.050                                 | -0.774                                  | ↓                                               | ----                                            |
| 8.10                   | 180.5359                            | -0.069                                 | -0.753                                  | ↓                                               | ----                                            |
| 8.10                   | 193.5648                            | -0.056                                 | -0.692                                  | ↓                                               | ----                                            |
| 8.11                   | 193.0628                            | -0.053                                 | -0.737                                  | ↓                                               | ----                                            |
| 8.14                   | 201.0492                            | -0.051                                 | -0.728                                  | ↓                                               | ----                                            |
| 8.27                   | 238.5014                            | 0.126 (0.146)                          | 0.913 (0.949)                           | ↑                                               | ↑                                               |
| 8.41                   | 153.5600                            | 0.052                                  | 0.649                                   | ↑                                               | ----                                            |

Table S2. Continued.

| Retention<br>Tim (min) | Detected<br>Mass [M+H] <sup>+</sup> | p[1]<br>(contribution)<br><sup>a</sup> | p(corr)[1]<br>(confidence) <sup>b</sup> | Cranberry juice<br>vs. Apple juice <sup>c</sup> | Cranberry<br>juice vs.<br>Baseline <sup>d</sup> |
|------------------------|-------------------------------------|----------------------------------------|-----------------------------------------|-------------------------------------------------|-------------------------------------------------|
| 8.47                   | 83.0863                             | 0.050 (0.050)                          | 0.691 (0.768)                           | ↑                                               | ↑                                               |
| 8.79                   | 213.0655                            | 0.051 (0.066)                          | 0.620 (0.758)                           | ↑                                               | ↑                                               |

<sup>a</sup> The p[1] values of OPLS-DA model comparing cranberry juice with baseline are in inside the parentheses.

<sup>b</sup> The p (corr) [1] values of OPLS-DA model comparing cranberry juice with baseline are in inside the parentheses.

<sup>c</sup> Arrows indicated an increase or decrease of metabolite level in human urine after drinking cranberry juice versus apple juice.

<sup>d</sup> Arrows indicated an increase or decrease of metabolite level in human urine after drinking cranberry juice versus baseline.

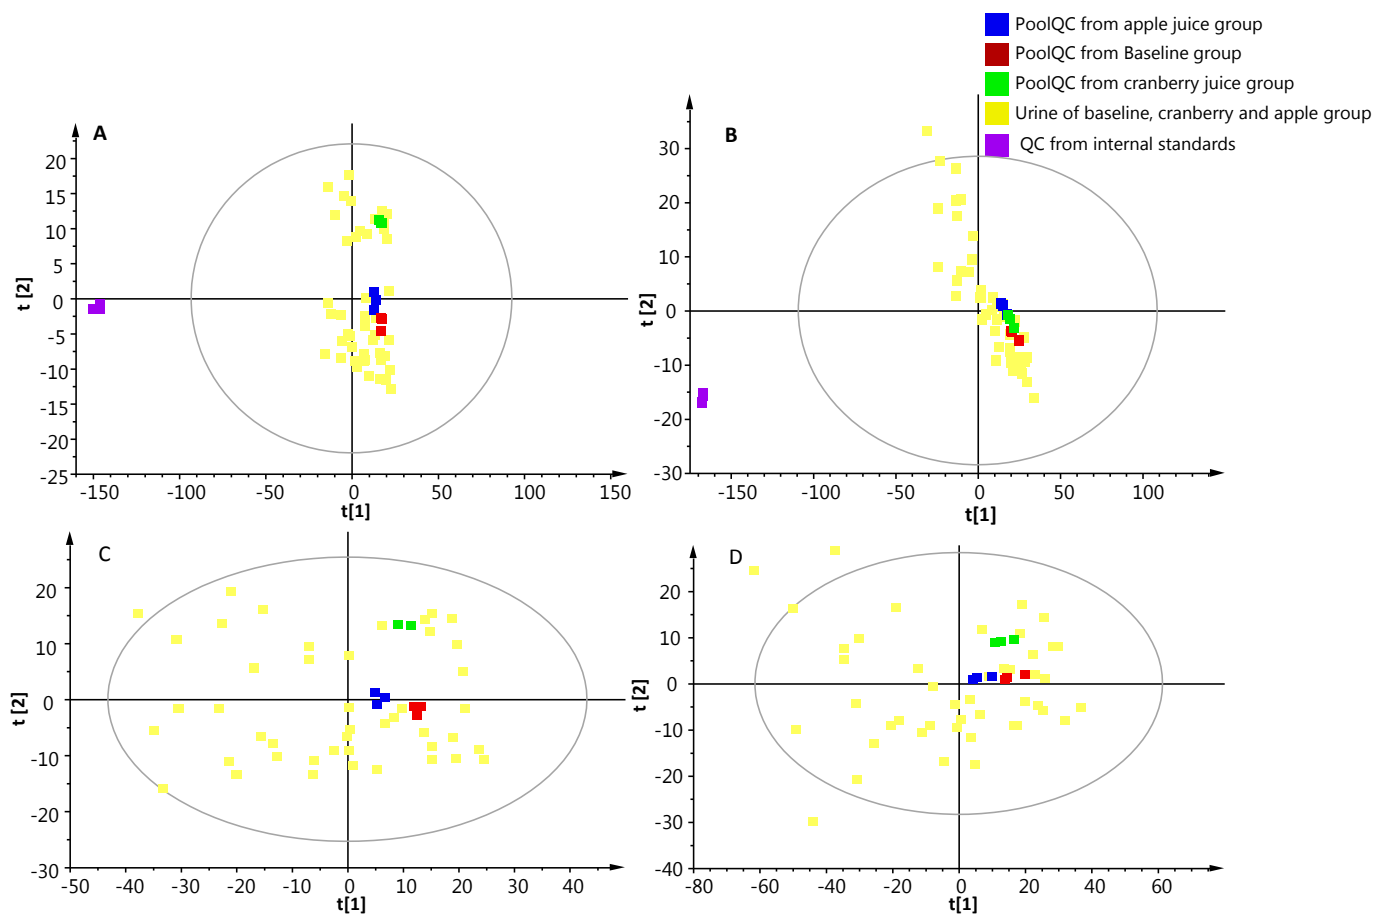

**Figure S1.** The PCA score plots of urine and quality control samples. Data in panel A and C were acquired by negative ionization. Data in panel B and D were acquired by positive ionization. Blue squares: pooled QC from apple juice group. Red squares: pooled QC from baseline group. Green squares: pooled QC from cranberry juice group. Yellow squares represent urine samples of baseline, apple juice and cranberry juice group. Purple squares represent neat QC created from pure internal standards.

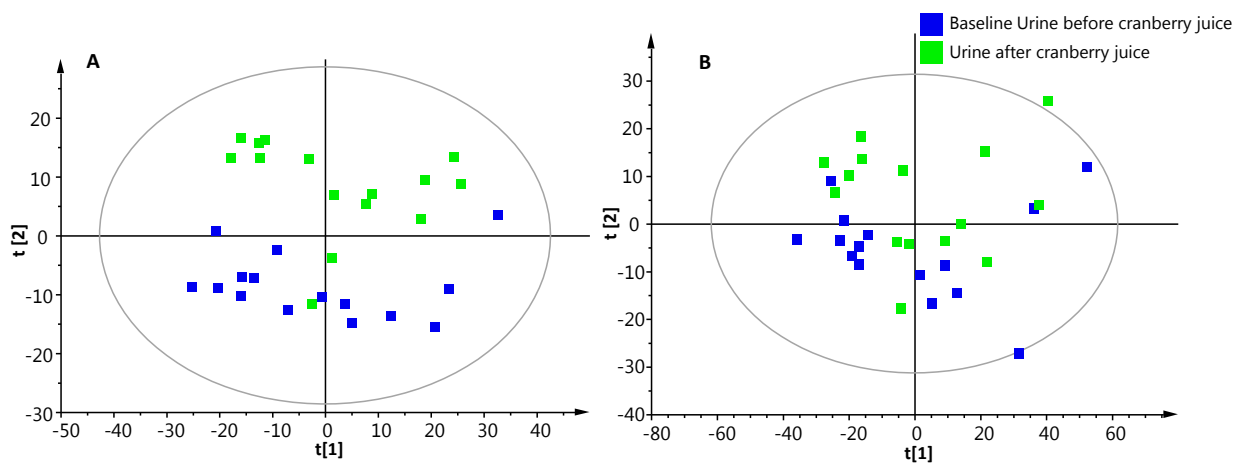

**Figure S2.** The PCA score plot of human baseline urine and human urine after cranberry juice. Data in panel A were acquired by negative ionization. Data in panel B were acquired by positive ionization. Blue squares: baseline urine before drinking cranberry juice. Green squares: urine after drinking cranberry juice.



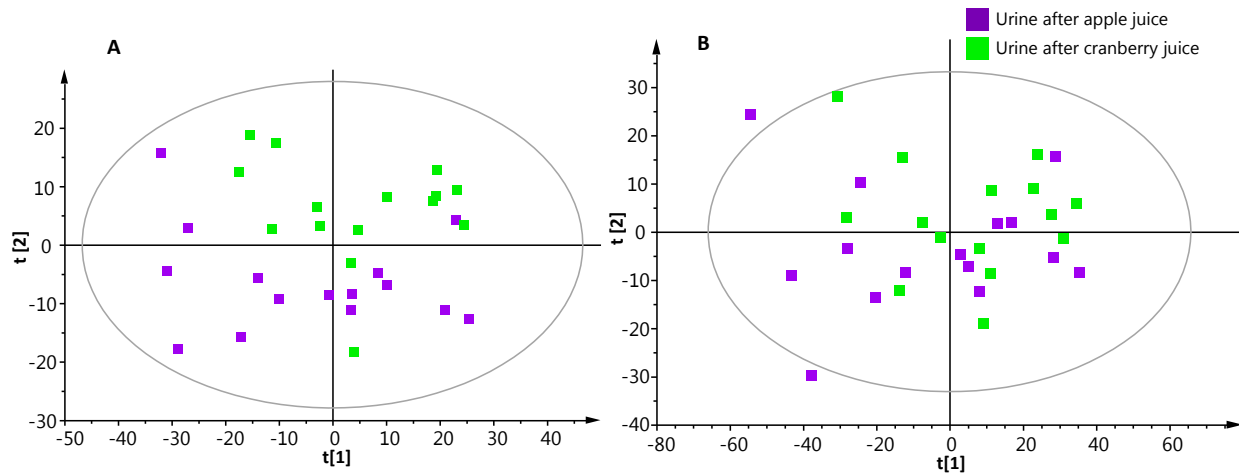

**Figure S3.** The PCA score plot of human urine after drinking apple juice or cranberry juice. Data in panel A were acquired by negative ionization. Data in panel B were acquired by positive ionization. Purple squares: urine after drinking apple juice. Green squares: urine after drinking cranberry juice.
